# Supplementary material
Source: MDPI journal article supplement (https://www.mdpi.com/2073-445X/2/3/472)
Supplement: s1 [file s1]

**OPEN ACCESS**

***land***

**ISSN 2073-445X**

www.mdpi.com/journal/land/

Supplementary Information

Linking Land Cover Data and Crop Yields for Mapping and Assessment of Pollination Services in Europe. *Land* 2013, *2*, 472–492

Grazia Zulian, Joachim Maes * and Maria Luisa Paracchini

Institute for Environment and Sustainability, European Commission–Joint Research Centre,
Via E. Fermi 2749, Ispra 20127, Italy; E-Mails: grazia.zulian@jrc.ec.europa.eu (G.Z.); luisa.paracchini@jrc.ec.europa.eu (M.L.P.)

***** Author to whom correspondence should be addressed; E-Mail: joachim.maes@jrc.ec.europa.eu;
Tel.: +39-332-789-148; Fax: +39-332-786-645.

GIS Operations

This section supports Figure 2 of the paper and describes in more detail the different GIS operations that were performed to obtain final maps for floral availability and nesting suitability. GIS steps that were taken to obtain layers in each of the five model components of Figure 2 are presented separately.

1. Land Use Component

The land use component makes a spatial join between the CORINE Land Cover data and Table S1 and updates the scores of floral availability (FA) and nesting suitability (NS) with additional spatial information of high nature value farmland (HNVF):

1. Reclass the CLC data 2000 with the FA and NS values reported in Table S1;
2. Overlay with the olive crop data and adjust values for FA and NS;
3. Intersect with the HNVF data and increase the scores according to Table S1 using raster sum;
4. Set the scores on land cover types with code 211, 212, 244, 311, 312 and 313 to 0 (for replacing with scores based on the agricultural and forest model components).

2. Agricultural Component

The agricultural component replaces scores for FA and NS on the CLC land cover types with codes 211 and 212 using data from the CAPRI model and using a layer on semi-natural vegetation in agricultural areas (SNV):

1. Set agricultural scores, according with crop shares:
   - 1. Extract arable parcels from CORINE Land cover (211–212) that intersect with the Homogenous Soil Mapping Units (HSMU) from the CAPRI model;
     2. Calculate an average score weighted by the crop share according to CAPRI data (Table S2);
2. Increase the value of agricultural parcels if they overlap with HNV farmland or SNV using the raster sum function.

3. Forest Component

The forest component replaces scores for FA and NS on the CLC land cover types with codes 244, 311, 312 and 313 using a High Resolution Forest Map (HRFM):

1. Select the CLC forest data types with codes 244, 311, 312 and 313:
   - 1. Compute an internal Euclidean distance;
     2. Mask out the internal edges for CLC forest types;
     3. Score the edges and cores according to Table S3;
     4. Weigh the cores using the Euclidean distance layer with values decreasing according to the same function that we are using for the foraging distance (Exp(−“distance”/alpha)) while keeping the edge value unchanged, where distance is the Euclidean distance and alpha is the flight distance;
2. Forest cover Model High Resolution Map (HRM):
   - 1. Extract data inside natural, semi natural and agricultural landscapes that do not overlap with CORINE Land Cover forest classes;
     2. Aggregate the result to 100 m using the proportion covered as spatial surrogate;
3. Sum the layers obtained under Steps 1 and 2.

4. Water Component

The water component scores land cover parcels if they overlap with a riparian area. It extends the riparian zone model that covers the land class types (Table S4) with land cover types in Table S5:

1. Extract all lakes and rivers boundaries inside the natural, semi natural and agricultural CLC land class types according to Table S5 (excluding artificial land types);
2. Compute a Euclidean distance at 25 m resolution;
3. Score lakes (W1) and rivers boundaries (W2) according to Table S6;
4. Do the following overlay and map algebra operations:
   - 1. Sum the riparian zones (based on the riparian zone model) and the lake sides (W1);
     2. Sum W1 and the river sides (W2);
     3. Cut off at a maximum score of 0.8;
5. Aggregate the result to 100 m (using the option AVERAGE).

4. Road Side Component

The road side component scores land cover parcels if they overlap with road side according to the following procedure:

1. Extract roads available in the TeleAtlas data inside: all natural, semi natural and agricultural CLC land cover types (excluding artificial land cover types);
2. Take the Euclidean distance at 25 m resolution;
3. Score each road type according to table S7;
4. Now overlay:
   - 1. Motorways with Main roads (R1);
     2. R1 with other major roads (R2);
     3. R2 with secondary roads (R3);
     4. R3 with local connecting roads (R4);
     5. R4 with local roads of high importance (R5);
     6. Cut off at a maximum score of 0.8;
5. Aggregate the result to 100 m (using the option AVERAGE).

**Table S1.** Floral availability (FA) and nesting suitability (NS) scores for the CORINE Land Cover (CLC) types. HNV_F+ and HNV_N+ represent additional scores for FA and NS, respectively, on High Nature Value (HNV) farmland.

| **CLC Code** | **Description** | | **FA** | **HNV_F+** | **NS** | **HNV_N+** |
| --- | --- | --- | --- | --- | --- | --- |
| 111 | Continuous urban fabric | | 0.05 | 0 | 0.1 | 0 |
| 112 | Discontinuous urban fabric | | 0.3 | 0 | 0.3 | 0 |
| 121 | Industrial or commercial units | | 0.05 | 0 | 0.1 | 0 |
| 122 | Road and rail networks and associated land | | 0.25 | 0 | 0.3 | 0 |
| 123 | Port areas | | 0 | 0 | 0.3 | 0 |
| 124 | Airports | | 0.1 | 0 | 0.3 | 0 |
| 131 | Mineral extraction sites | | 0.05 | 0 | 0.3 | 0 |
| 132 | Dump sites | | 0 | 0 | 0.05 | 0 |
| 133 | Construction sites | | 0 | 0 | 0.1 | 0 |
| 141 | Green urban areas | | 0.25 | 0 | 0.3 | 0 |
| 142 | Sport and leisure facilities | | 0.05 | 0 | 0.3 | 0 |
| 211 | Non-irrigated arable land* | | 0.2 | 0 | 0.2 | 0 |
| 212 | Permanently irrigated land* | | 0.05 | 0 | 0.2 | 0 |
| 213 | Rice fields | | 0.05 | 0 | 0.2 | 0 |
| 221 | Vineyards | | 0.6 | 0.2 | 0.4 | 0.1 |
| 222 | Fruit trees and berry plantations | | 0.9 | 0 | 0.4 | 0.1 |
| 223 | Olive groves** | intensive | 0.2 | 0.2 | 0.4 | 0.1 |
| extensive | 0.6 | 0.2 | 0.6 | 0.1 |
| 231 | Pastures | | 0.2 | 0.2 | 0.3 | 0.2 |
| 241 | Annual crops associated with permanent crops | | 0.5 | 0.2 | 0.4 | 0.1 |
| 242 | Complex cultivation patterns | | 0.4 | 0.2 | 0.4 | 0.1 |
| 243 | Land principally occupied by agriculture, with significant areas of natural vegetation | | 0.75 | 0.05 | 0.7 | 0.1 |

**Table S1.** *Cont.*

| **CLC Code** | **Description** | **FA** | **HNV_F+** | **NS** | **HNV_N+** |
| --- | --- | --- | --- | --- | --- |
| 244 | Agro-forestry areas*** | 0.5 | 0.4 | 1 | 0 |
| 311 | Broad-leaved forest*** | 0.9 | 0 | 0.8 | 0 |
| 312 | Coniferous forest*** | 0.3 | 0 | 0.8 | 0 |
| 313 | Mixed forest*** | 0.6 | 0 | 0.8 | 0 |
| 321 | Natural grasslands | 1 | 0 | 0.8 | 0 |
| 322 | Moors and heathland | 1 | 0 | 0.9 | 0 |
| 323 | Sclerophyllous vegetation | 0.75 | 0 | 0.9 | 0 |
| 324 | Transitional woodland-shrub | 0.85 | 0 | 1 | 0 |
| 331 | Beaches, dunes, sands | 0.1 | 0 | 0.3 | 0 |
| 332 | Bare rocks | 0 | 0 | 0 | 0 |
| 333 | Sparsely vegetated areas | 0.35 | 0 | 0.7 | 0 |
| 334 | Burnt areas | 0.2 | 0 | 0.3 | 0 |
| 335 | Glaciers and perpetual snow | 0 | 0 | 0 | 0 |
| 411 | Inland marshes | 0.75 | 0 | 0.3 | 0 |
| 412 | Peat bogs | 0.5 | 0 | 0.3 | 0 |
| 421 | Salt marshes | 0.55 | 0 | 0.3 | 0 |
| 422 | Salines | 0 | 0 | 0 | 0 |
| 423 | Intertidal flats | 0 | 0 | 0 | 0 |
| 511 | Water courses | 0 | 0 | 0 | 0 |
| 512 | Water bodies | 0 | 0 | 0 | 0 |
| 521 | Coastal lagoons | 0 | 0 | 0.2 | 0 |
| 522 | Estuaries | 0 | 0 | 0 | 0 |

* The values for non-irrigated arable land and for permanently irrigated land of Table S1 are in the model replaced with values based on Table S2 using additional spatial data. Readers who wish to assess floral availability and nesting suitability of these land types using CORINE Land Cover data only may use the values suggested in Table S1.

** The land cover type olive groves was scored using additional spatial information. Readers who wish to assess floral availability and nesting suitability of olive groves using CORINE Land Cover data only may use an average value.

*** The values for agro-forestry areas, broad-leaved forest, coniferous forest and mixed forest of Table S1 are in the model replaced with values based on Table S3 using additional spatial data. Readers who wish to assess floral availability and nesting suitability of forests using CORINE Land Cover data only may use the values suggested in Table S1.

**Table S2.** Floral availability (FA) and nesting suitability (NS) scores for crops available in the CAPRI model. Dependency of crops on insect pollination (%) *.

| **Group** | **Crop Type** | **CAPRI Code** | **FA** | **NS** | **Dependency (%)** |
| --- | --- | --- | --- | --- | --- |
| **Cereals** | Soft wheat | SWHE | 0.05 | 0.1 | 0 |
| Durum wheat | DWHE | 0.05 | 0.1 | 0 |
| Rye and meslin | RYEM | 0.05 | 0.1 | 0 |
| Barley | BARL | 0.05 | 0.1 | 0 |
| Oats | OATS | 0.05 | 0.1 | 0 |
| Paddy rice | PARI | 0 | 0 | 0 |
| Maize | MAIZ | 0 | 0.1 | 0 |
| Other cereals | OCER | 0.05 | 0.1 | 0 |

**Table S2.** *Cont.*

| **Group** | **Crop Type** | **CAPRI Code** | **FA** | **NS** | **Dependency (%)** |
| --- | --- | --- | --- | --- | --- |
| **Oilseeds** | Rapeseed | RAPE | 0.9 | 0.1 | 25 |
| Sunflower | SUNF | 0.9 | 0.1 | 25 |
| Soya | SOYA | 0.5 | 0.1 | 25 |
| Olives for oil** | OLIV | 0.6 | 0.6 | 0 |
| Other oilseeds | OOIL | 0.5 | 0.1 | 17.5 |
| **Other annual crops** | Pulses | PULS | 0.7 | 0.1 | 5 |
| Potatoes | POTA | 0.7 | 0.1 | 0 |
| Sugar beet | SUGB | 0.25 | 0.1 | 0 |
| Flax and hemp | TEXT | 0 | 0 | 5 |
| Tobacco | TOBA | 0 | 0 | 0 |
| Other industrial crops | OIND | 0.5 | 0.1 | 0 |
| **Vegetables**  **Fruits**  **Other perennials** | Tomatoes | TOMA | 0.7 | 0.4 | 5 |
| Other vegetables | OVEG | 0.75 | 0.4 | 0 |
| Apples, pear & peaches** | APPL | 0.9 | 0.4 | 65 |
| Citrus fruits** | CITR | 0.9 | 0.4 | 5 |
| Other fruits** | OFRU | 0.9 | 0.4 | 40 |
| Table grapes** | TAGR | 0.9 | 0.4 | 0 |
| Table olives | TABO | 0.5 | 0.1 | 0 |
| Table wine** | TWIN | 0.9 | 0.4 | 0 |
| Nurseries | NURS | 0 | 0 | 0 |
| Flowers | FLOW | 0.9 | 0.05 | 0 |
| Other marketable crops | OCRO | 0.5 | 0.4 | 0 |
| **Fodder production** | Fodder maize | MAIF | 0 | 0.1 | 0 |
| Fodder root crops | ROOF | 0.75 | 0.1 | 0 |
| Other fodder on arable land | OFAR | 0.5 | 0.4 | 0 |

* dependency data from [S1].

** in correspondence with Table S1.

**Table S3.** Floral availability (FA) and nesting suitability (NS) scores in forest.

| **Forest Type** | **Edge or Core** | **FA** | **NS** |
| --- | --- | --- | --- |
| Broad-leaved forest | edge forest (50 m) | 1 | 0.9 |
| core forest | 0.9 | 0.7 |
| Coniferous forest | edge forest (50 m) | 0.4 | 0.9 |
| core forest | 0.3 | 0.7 |
| Mixed forest | edge forest (50 m) | 0.7 | 0.9 |
| core forest | 0.6 | 0.7 |

**Table S4.** CORINE Land Cover 2000 classes included in the riparian zone model.

| **Level 1** | **Level 2** | **Level 3** |
| --- | --- | --- |
| Forest and semi natural areas | Forests | Broad-leaved forest |
| Coniferous forest |
| Mixed forest |
| Scrub and/or herbaceous vegetation associations | Natural grasslands |
| Moors and heathland |
| Sclerophyllous vegetation |
| Open spaces with little or no vegetation | Transitional woodland-shrub |
| Sands, Beaches, Dunes |
| Water bodies | Inland waters | Water courses |

**Table S5.** CORINE Land Cover 2000 classes included in the extension of the riparian zone model.

| **Level 1** | **Level 2** | **Level 3** |
| --- | --- | --- |
| Agricultural areas | Arable land | Non-irrigated arable land |
| Permanently irrigated land |
| Rice fields |
| Permanent crops | Vineyards |
| Fruit trees and berry plantations |
| Olive groves |
| Pastures | Pastures |
| Heterogeneous agricultural areas | Annual crops associated with permanent crops |
| Complex cultivation patterns |
| Land principally occupied by agriculture, with significant areas of natural vegetation |
| Agro-forestry areas |
| Forest and semi natural areas | Open spaces with little or no vegetation | Bare rocks |
| Sparsely vegetated areas |
| Burnt areas |
| Glaciers and perpetual snow |
| Wetlands | Inland wetlands | Inland marshes |
| Peat bogs |
| Maritime wetlands | Salt marshes |
| Salines |
| Intertidal flats |

**Table S6.** Floral availability (FA) and nesting suitability (NS) scores in riparian areas.

| **Riparian Area** |  | **NS** | **FA** |
| --- | --- | --- | --- |
| delineated in the riparian zone model |  | 0.8 | 0.8 |
| not available in the riparian zone model | river network | 0.5 | 0.5 |
| lakes boundaries | 0.7 | 0.7 |

**Table S7.** Floral availability (FA) and nesting suitability (NS) scores for road sides.

| **Road Category** | **FA** | **NS** |
| --- | --- | --- |
| Motorways | 0.8 | 0.8 |
| Main roads | 0.8 | 0.8 |
| Other major roads | 0.5 | 0.5 |
| Secondary roads | 0.3 | 0.3 |
| Local connecting roads | 0.2 | 0.2 |
| Local roads of high importance | 0.1 | 0.1 |

**Table S8.** Dependency of crops on insect pollination (%) for dependent crop types reported by Eurostat.

| **Eurostat Crop Type** | **Dependency (%)** |
| --- | --- |
| Dried pulses and protein crops for the production of grain (including seed and mixtures of cereals and pulses) | 5 |

**Table S8.** *Cont.*

| **Eurostat Crop Type** | **Dependency (%)** |
| --- | --- |
| Rape and turnip rape | 25 |
| Rape | 25 |
| Winter rape | 25 |
| Spring rape | 25 |
| Sunflower seed | 25 |
| Linseed (oil flax) | 25 |
| Soya | 25 |
| Cotton seed | 25 |
| Fibre crops | 5 |
| Fibre flax | 5 |
| Hemp | 5 |
| Cotton fibre | 5 |
| Hops | 5 |
| Chicory | 5 |
| Chicory for inulin | 5 |
| Aromatic plants, medicinal and culinary plants | 5 |
| Other industrial crops n.e.c. | 5 |
| Tomatoes | 5 |
| Tomatoes for fresh consumption | 5 |
| Tomatoes for fresh consumption under glass or high accessible cover | 5 |
| Cucumbers | 65 |
| Cucumbers under glass or high accessible cover | 65 |
| Gherkins | 65 |
| Eggplants, gourds, marrows, courgettes, pumpkins | 95 |
| Eggplants | 25 |
| Gourds, marrows and pumpkins | 95 |
| Courgettes | 65 |
| Red pepper, capsicum | 5 |
| Red pepper, capsicum under glass or high accessible cover | 5 |
| Pulses | 5 |
| Beans | 25 |
| Other pulses n.e.c. | 5 |
| Melons | 95 |
| Melons and Strawberries | 50 |
| Watermelons | 95 |
| Strawberries | 25 |
| Vegetables, melons and strawberries (including kitchen gardens) | 65 |
| Dessert fruit (do not include olives, raisins, grapes for juice and wine , wild products, fruits from kitchen gardens and apples and pears for other uses than dessert) | 40 |
| Fruit trees (excluding olives and citrus fruit) | 40 |
| Apples | 65 |
| Apples for fresh consumption | 65 |
| Golden Delicious | 65 |
| Other apples for fresh consumption | 65 |
| Pears | 65 |

**Table S8.** *Cont.*

| **Eurostat Crop Type** | **Dependency (%)** |
| --- | --- |
| Pears for fresh consumption | 65 |
| Stone fruits | 65 |
| Peaches | 65 |
| Nectarines | 65 |
| Apricots | 65 |
| Cherries | 65 |
| Sour cherries | 65 |
| Plums | 65 |
| Berries (excluding strawberries) | 65 |
| Currants | 25 |
| Black currants | 25 |
| Red currants | 25 |
| Raspberries | 65 |
| Gooseberries | 25 |
| Other berries n.e.c. | 25 |
| Nuts | 40 |
| Almonds | 65 |
| Figs | 25 |
| Kiwis | 95 |
| Avocados | 65 |
| Quinces | 65 |
| Other fruits from fruit trees n.e.c. | 65 |
| Citrus fruits | 5 |
| Pomelos and grapefruit | 5 |
| Lemons and acid limes | 5 |
| Oranges | 5 |
| Small citrus fruits | 5 |
| Satsumas | 5 |
| Clementines | 5 |
| Other citrus fruits n.e.c. | 5 |

Acknowledgments

This project was part of the PRESS-2 study. The authors thank Benis Egoh, Lorenzo Marini and Andrea Battisti for providing crucial input during an expert meeting. The maps that are published in this paper will be made available to readers on their request. Please contact the corresponding author.

Conflicts of Interest

The authors declare no conflict of interest.

References

1. Gallai, N.; Salles, J.M.; Settele, J.; Vaissière, B.E. Economic valuation of the vulnerability of world agriculture confronted with pollinator decline. *Ecol. Econ*. **2009**, *68*, 810–821.
